*Major Depressive Disorder and Suicide*

**FOCUS** THE JOURNAL OF LIFELONG LEARNING IN PSYCHIATRY

Winter 2008, Volume VI, Number 1

# FOCUS

THE JOURNAL OF LIFELONG LEARNING IN PSYCHIATRY



## *Major Depressive Disorder and Suicide*

### IN CLINICAL SYNTHESIS:

Recent Findings in the Pathophysiology  
of Depression

*Charles B. Nemeroff, M.D., Ph.D.*

Strategies for the Prevention and Treatment  
of Suicidal Behavior

*Paula Clayton, M.D.*

*Tracey Auster, B.A.*

Performance in Practice:  
Sample Tools for the Care of Patients  
with Major Depressive Disorder

*Laura J. Fochtmann, M.D. et al.*

Earn up to 5 extra CME credits for completing the Performance in Practice Survey

AND INFLUENTIAL PUBLICATIONS . . .
